# Supplementary material
Source: publisher figshare collection journal article supplement (https://geolsoc.figshare.com/articles/dataset/_/3454376)
Supplement: Supplementary file 1 [file 1]

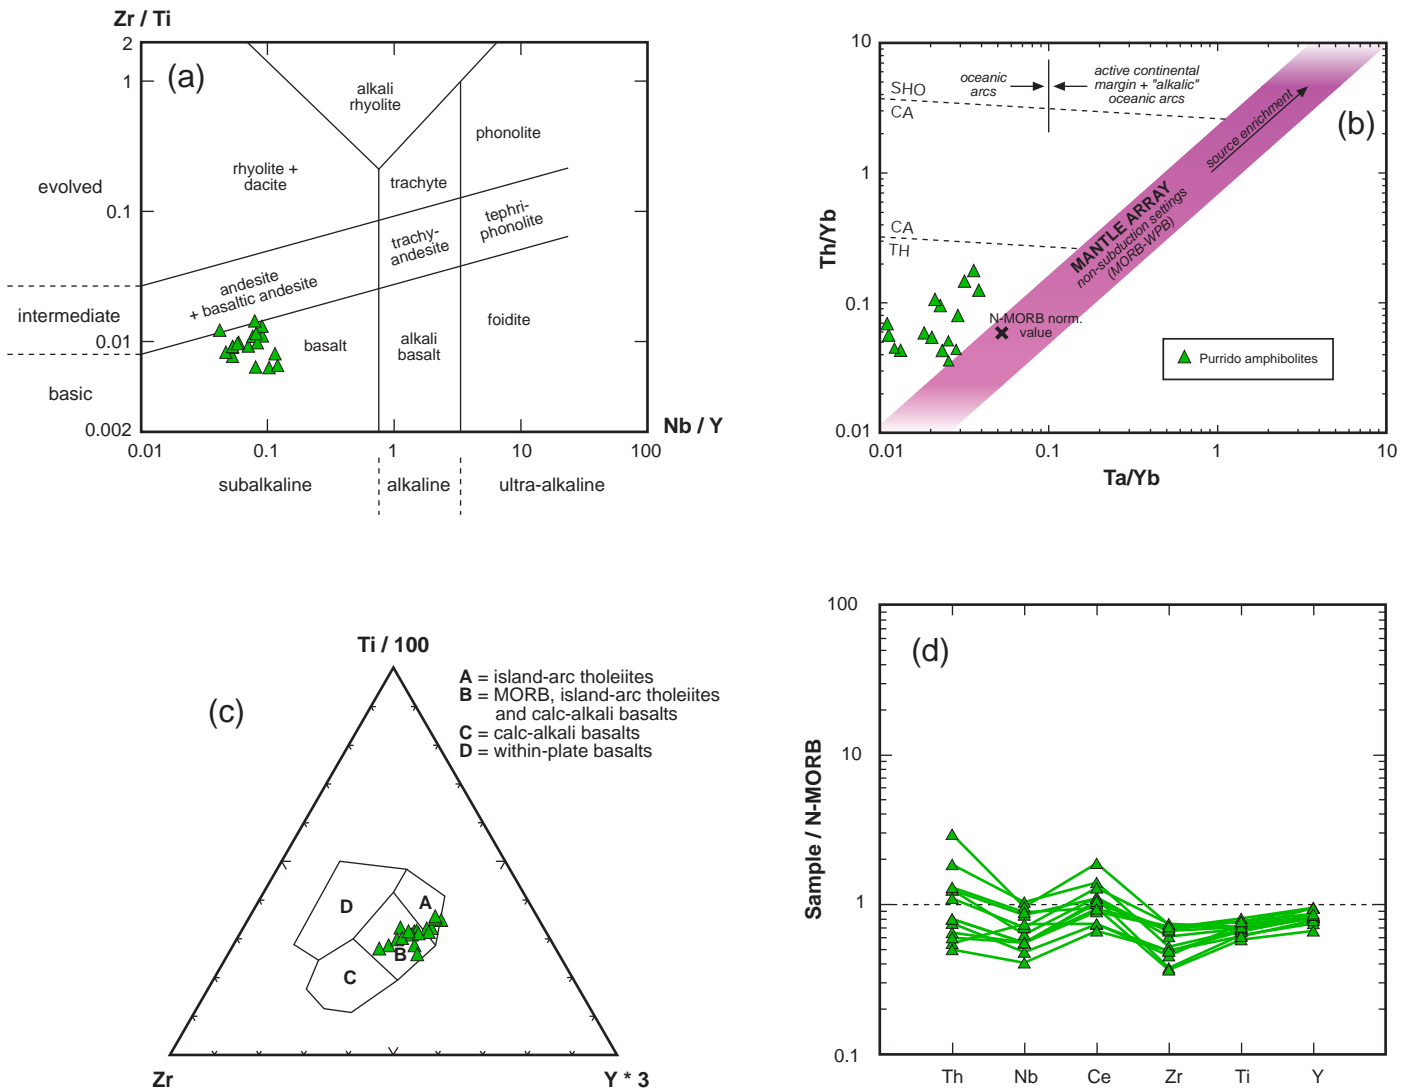

**Figure 1.** Chemical diagrams for the Purrido amphibolites. (a) Nb/Y-Zr/Ti diagram of Winchester and Floyd (1977; *Chemical Geology*, 20, 325-343) modified according to Pearce (1996; Short Course Notes, Geological Association of Canada, 12, 79-113). (b) Incompatible element ratio plot of Ta/Yb-Th/Yb (after Pearce, 1983; *Continental basalts and mantle xenoliths*, Shiva, Nantwich, 230-249). (c) Ti-Zr-Y tectonic discrimination diagram (Pearce and Cann, 1973; *Earth and Planetary Science Letters*, 19, 290-300). (d) N-MORB-normalized trace element patterns of the composition of each amphibolite sample; normalizing values are from Pearce (1996). In the last plot the negative Nb anomaly and the relative depletion in some elements are compatible with a subduction related origin.
